# Supplementary material
Source: PubMed Central journal article supplement (PMC5511546)
Supplement: NIHMS396361-supplement-01.pdf [file NIHMS396361-supplement-01.pdf]

**Table S2 – Drugs predicted to bind PhzB2**

| ID  | Name                                               | Structure                                                                                                                                                                                                                                                                                                                                                                                  | SMAP p-value | Glide Score |
|-----|----------------------------------------------------|--------------------------------------------------------------------------------------------------------------------------------------------------------------------------------------------------------------------------------------------------------------------------------------------------------------------------------------------------------------------------------------------|--------------|-------------|
| RAL | Raloxifene: Estrogen agonist                       | 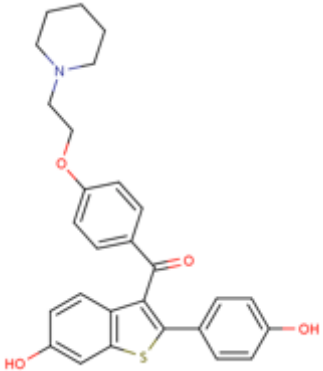 <p>The chemical structure of Raloxifene consists of a central thiophene ring. At the 2-position of the thiophene ring, there is a 4-hydroxyphenyl group. At the 3-position, there is a 4-(2-(pyrrolidin-1-yl)ethoxy)phenyl group. At the 4-position, there is a 5-hydroxy-1H-benzofuran-2-yl group.</p> | 2.65e-05     | -6.04       |
| EST | Estradiol: Steroid hormone                         |  <p>The chemical structure of Estradiol is a steroid nucleus with a phenolic A ring. It features a hydroxyl group at C3, a methyl group at C10, and a methyl group and a hydroxyl group at C13. The D ring is saturated, and the E ring is a five-membered ring with a methyl group at C14.</p>         | 7.06e-07     | -5.79       |
| JN3 | Chenodeoxycholic acid: Cholagogues and Choloretics |  <p>The chemical structure of Chenodeoxycholic acid is a steroid nucleus with a hydroxyl group at C3 and a methyl group at C10. It has a methyl group at C13 and a methyl group and a hydroxyl group at C14. At C17, there is a propionic acid side chain.</p>                                         | 7.08e-05     | -5.57       |

|     |                                                                 |                                                                                                                                                                                                                                                                                                                                                                                                                                                                       |          |       |
|-----|-----------------------------------------------------------------|-----------------------------------------------------------------------------------------------------------------------------------------------------------------------------------------------------------------------------------------------------------------------------------------------------------------------------------------------------------------------------------------------------------------------------------------------------------------------|----------|-------|
| DEX | Dexamethasone:<br>Glucocorticoid steroid drug                   | 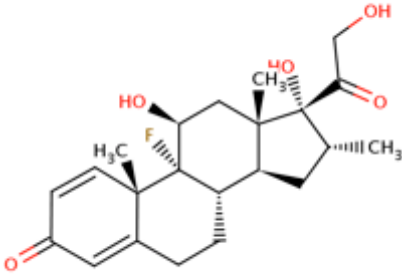 <p>The image shows the chemical structure of Dexamethasone, a synthetic glucocorticoid. It features a four-ring steroid nucleus with a ketone group at C3, a double bond between C4 and C5, a methyl group at C10, a fluorine atom at C9, and a methyl group at C13. At C17, there is a side chain consisting of a methyl group, a hydroxyl group, and a 2-hydroxyethyl group.</p> | 3.45e-05 | -5.29 |
| T3  | 3,5,3'-Triiodothyronine:<br>Peptide hormone agonist             |  <p>The image shows the chemical structure of 3,5,3'-Triiodothyronine (T3). It consists of a tyrosine derivative where the phenolic ring is substituted with three iodine atoms at the 3, 5, and 3' positions. The tyrosine side chain is shown with a primary amine group and a carboxylic acid group.</p>                                                                          | 2.36e-05 | -5.25 |
| TOP | Trimethoprim: Folic acid<br>antagonist; anti-infective<br>agent |  <p>The image shows the chemical structure of Trimethoprim. It features a pyrimidine ring with amino groups at the 2 and 4 positions, connected via a methylene bridge to a benzene ring. The benzene ring is substituted with three methoxy groups at the 3, 4, and 5 positions.</p>                                                                                              | 3.63e-05 | -4.96 |
| T44 | 3,5,3',5'-Tetraiodo-L-<br>thyronine: Peptide<br>hormone         |  <p>The image shows the chemical structure of 3,5,3',5'-Tetraiodo-L-thyronine (T44). It is similar to T3 but has an additional iodine atom at the 5' position of the phenolic ring, resulting in four iodine atoms in total.</p>                                                                                                                                                   | 2.18e-05 | -4.52 |

|     |                                                                |                                                                                                                                                                                                                                                                                                                                                                                                                        |          |       |
|-----|----------------------------------------------------------------|------------------------------------------------------------------------------------------------------------------------------------------------------------------------------------------------------------------------------------------------------------------------------------------------------------------------------------------------------------------------------------------------------------------------|----------|-------|
| FUA | Fusidic acid: Antibacterial agent; protein synthesis inhibitor | 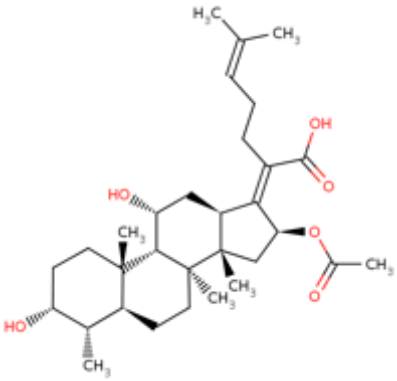 <p>The chemical structure of Fusidic acid is a complex polycyclic molecule. It features a pentacyclic steroid-like core with several methyl groups (CH<sub>3</sub>) and hydroxyl groups (OH) attached. A long side chain is attached to the core, ending in a carboxylic acid group (COOH) and a methyl group (CH<sub>3</sub>).</p> | 3.24e-05 | -4.32 |
| SNL | Spironalactone: aldosterone (steroid) agonist                  |  <p>The chemical structure of Spironalactone is a steroid derivative. It features a pentacyclic core with a ketone group (C=O) at the 3-position and a methyl group (CH<sub>3</sub>) at the 13-position. A side chain is attached to the core, ending in a sulfur atom (S) bonded to a methyl group (CH<sub>3</sub>).</p>             | 9.86e-05 | -4.52 |

The Glide score estimates the protein-ligand binding affinity for each drug predicted to bind to PhzB2. The more negative the score, the greater the predicted ability to interact.
