# Supplementary material
Source: PubMed Central journal article supplement (PMC5511546)
Supplement: NIHMS396361-supplement-02.pdf [file NIHMS396361-supplement-02.pdf]

## 4 Supplementary Tables

**Table S1 – Prioritized drug targets by category**

| Locus ID      | Category | Gene name   | Annotation                                                     | PDB ID |
|---------------|----------|-------------|----------------------------------------------------------------|--------|
| PA4848        | 1        | accC        | acetyl-CoA carboxylase biotin carboxylase subunit              | 2VQD_A |
| PA5163        | 1        | rmlA        | glucose-1-phosphate thymidyltransferase                        | 1GIL_A |
| PA5243        | 1        | hemB        | delta-aminolevulinic acid dehydratase<br>(EC:4.2.1.24)         | 1B4K_A |
| PA0593        | 2        | pdxA        | 4-hydroxythreonine-4-phosphate dehydrogenase<br>(EC:1.1.1.262) | 1YXO_A |
| PA2011        | 2        | liuE        | hydroxymethylglutaryl-CoA lyase (EC:4.1.3.4)                   | 2FTP_A |
| PA2666        | 2        | queD        | 6-pyruvoyl tetrahydrobiopterin synthase                        | 2OBA_A |
| PA3645        | 2        | fabZ        | (3R)-hydroxymyristoyl-ACP dehydratase                          | 1U1Z_A |
| PA3652        | 2        | uppS        | undecaprenyl pyrophosphate synthetase                          | 2H69_A |
| PA4366        | 2        | sodB        | superoxide dismutase                                           | 1DT0_A |
| PA5322        | 3        | algC        | phosphomannomutase AlgC                                        | 1P5D_X |
| PA3540        | 3        | algD        | GDP-mannose 6-dehydrogenase AlgD                               | 1MUU_A |
| PA4211/PA1900 | 4        | phzB1/phzB2 | phenazine biosynthesis protein                                 | 3FF0_A |
| PA4213/PA1902 | 4        | phzD1/phzD2 | phenazine biosynthesis protein PhzD                            | 1NF9_A |
| PA4209        | 4        | phzM        | putative phenazine-specific methyltransferase                  | 2IP2_A |
| PA4217        | 4        | phzS        | hypothetical protein                                           | 3C96_A |
| PA1432        | 4        | lasI        | autoinducer synthesis protein LasI                             | 1RO5_A |
| PA4406        | 1,4      | lpxC        | UDP-3-O-[3-hydroxymyristoyl] N-acetylglucosamine deacetylase   | 2VES_A |
| PA4425        | 1,4      | gmhA        | phosphoheptose isomerase                                       | 1X92_A |
| PA4216/PA1905 | 2,4      | phzG1/phzG2 | pyridoxamine 5'-phosphate oxidase                              | 1T9M_A |
| PA1375        | 2,5      | pdxB        | erythronate-4-phosphate dehydrogenase                          | 2O4C_A |

### Category Explanations

| Number | Description                                        | References    |
|--------|----------------------------------------------------|---------------|
| 1      | Essential <i>in vivo</i> , Essential in silico     | (3), (4), (5) |
| 2      | Essential <i>in vivo</i> , not essential in silico | (3), (4), (5) |
| 3      | Involved in Alginate Biosynthesis                  | (6)           |
| 4      | Virulence Factors                                  | (5)           |
| 5      | Resistome                                          | (2)           |
