# Supplementary material
Source: PubMed Central journal article supplement (PMC5511546)

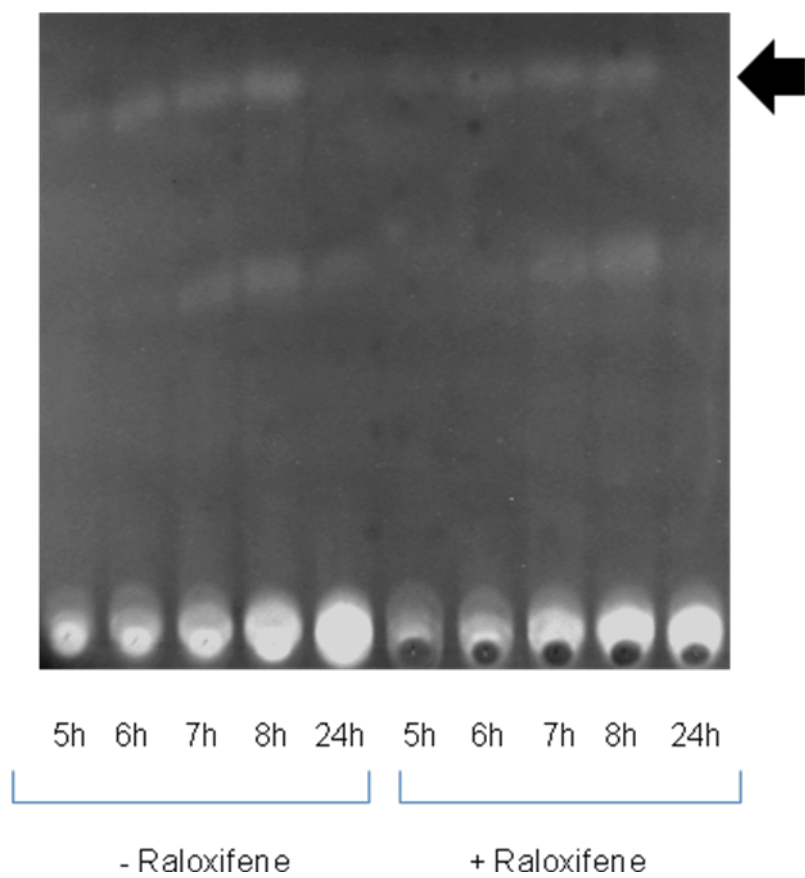

**Figure S4**

Supplement: NIHMS396361-supplement-03.pdf [file NIHMS396361-supplement-03.pdf]

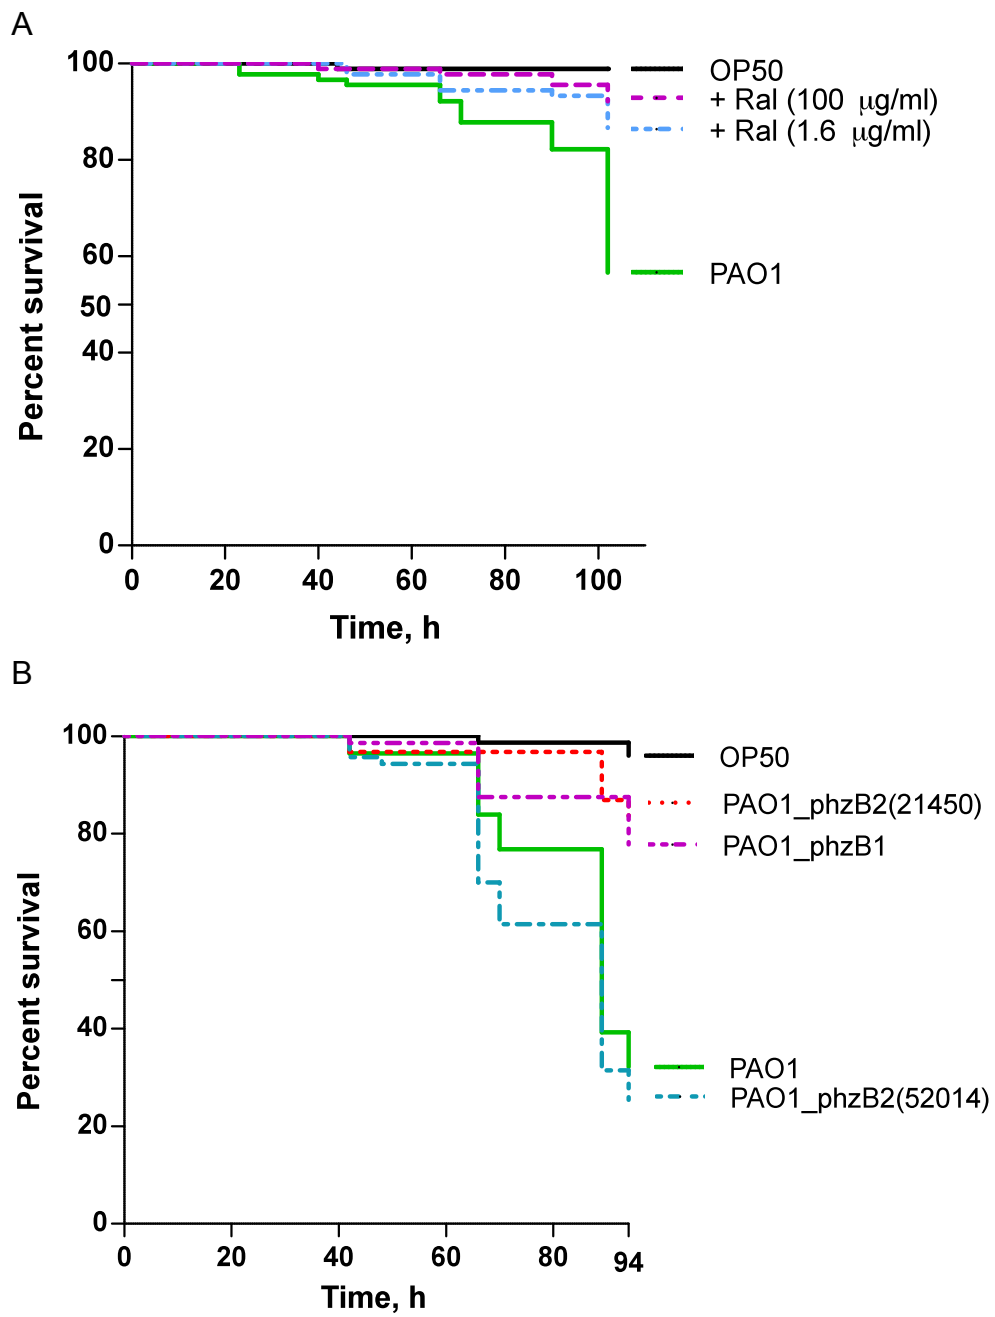

**Figure S3**

Supplement: NIHMS396361-supplement-04.pdf [file NIHMS396361-supplement-04.pdf]

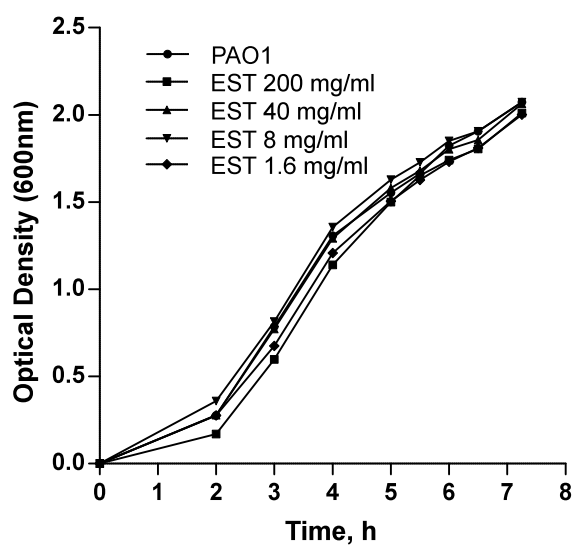

A

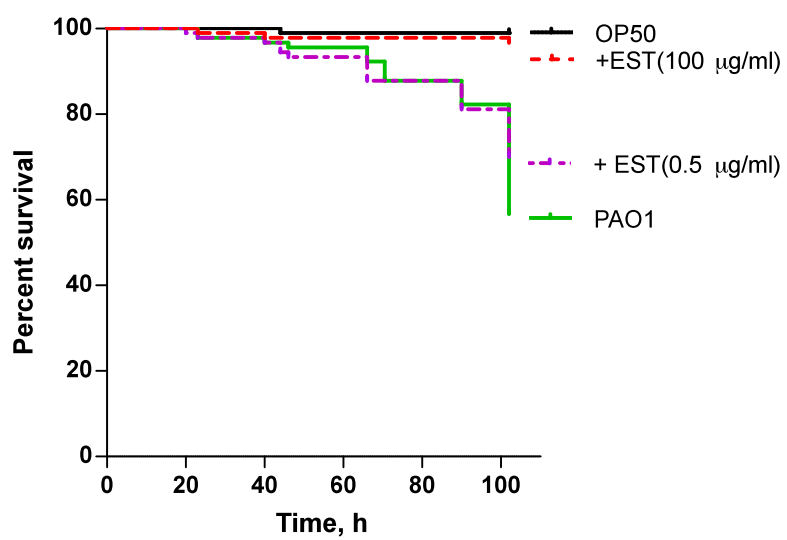

B

Figure S2

Supplement: NIHMS396361-supplement-05.pdf [file NIHMS396361-supplement-05.pdf]

### 3 Supplementary Figures

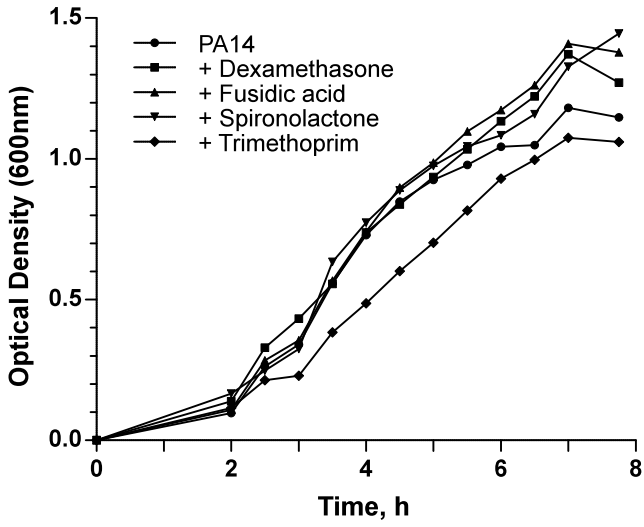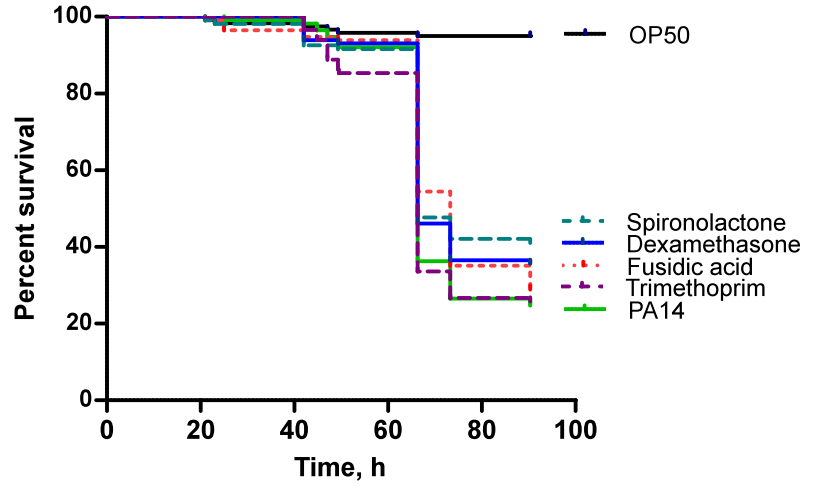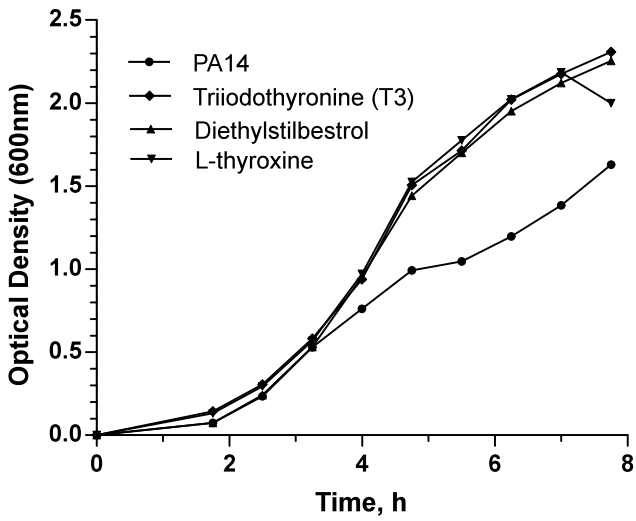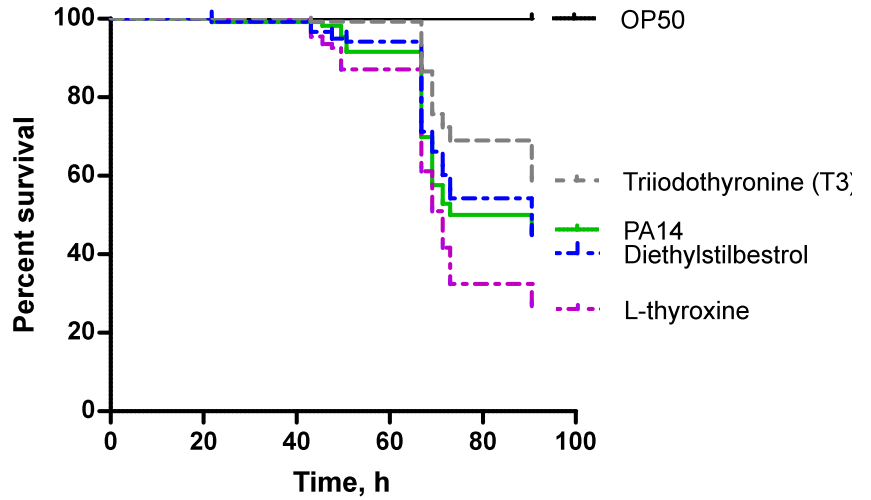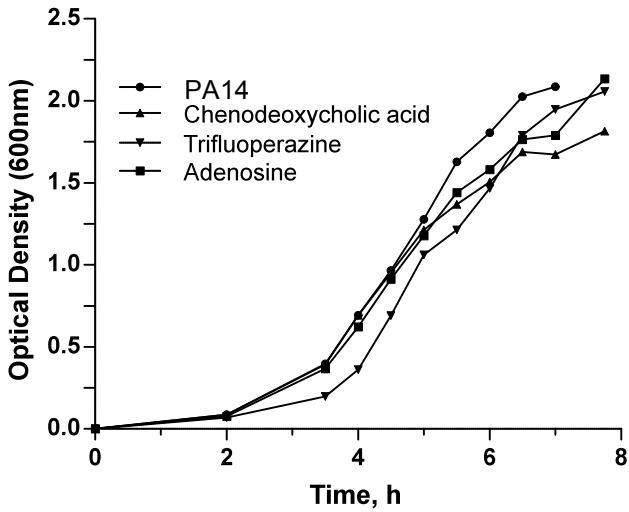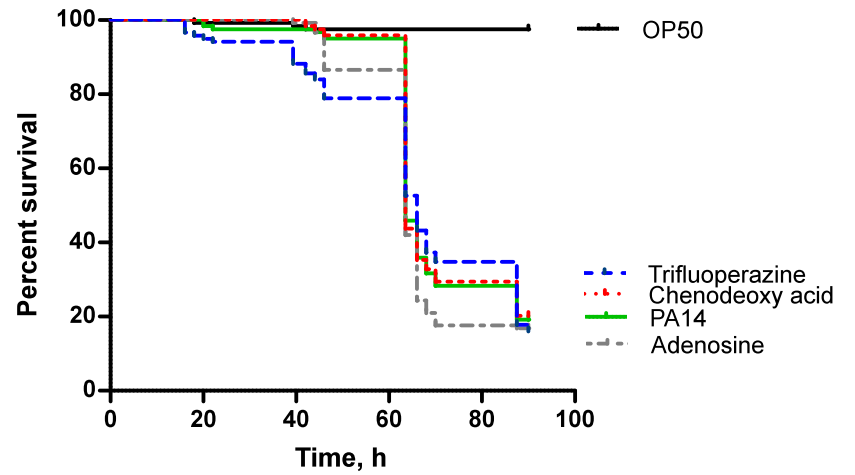

Figure S1

Supplement: NIHMS396361-supplement-06.pdf [file NIHMS396361-supplement-06.pdf]
